# Supplementary material
Source: Springer Nature journal article supplement (https://www.springermedizin.de/resource/supplementary/12876_2009_383_MOESM3_ESM.pdf/9439294)

A

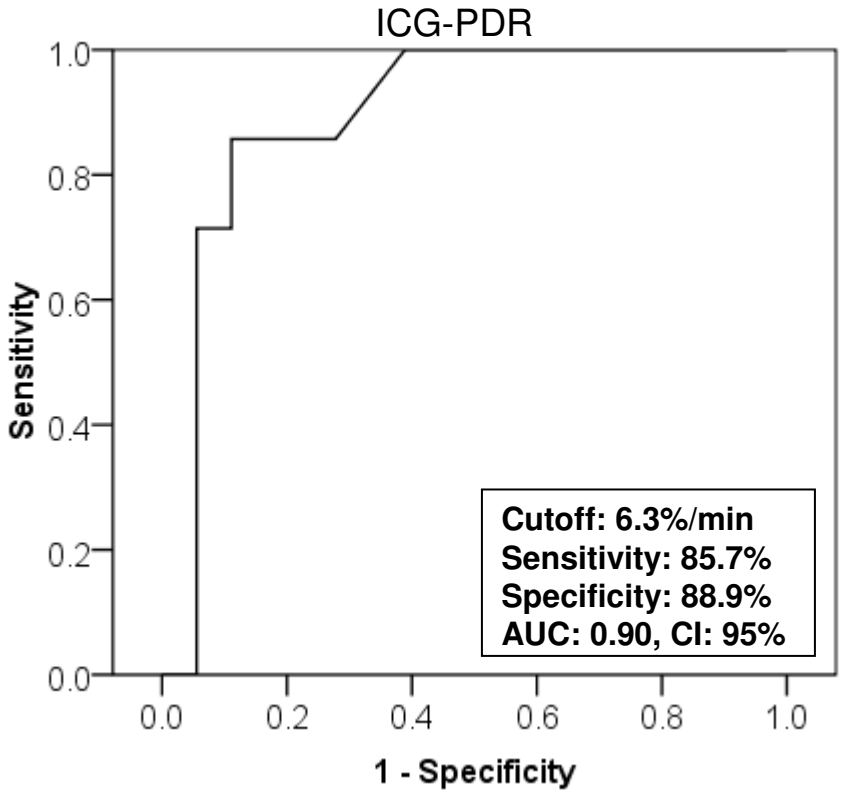

B

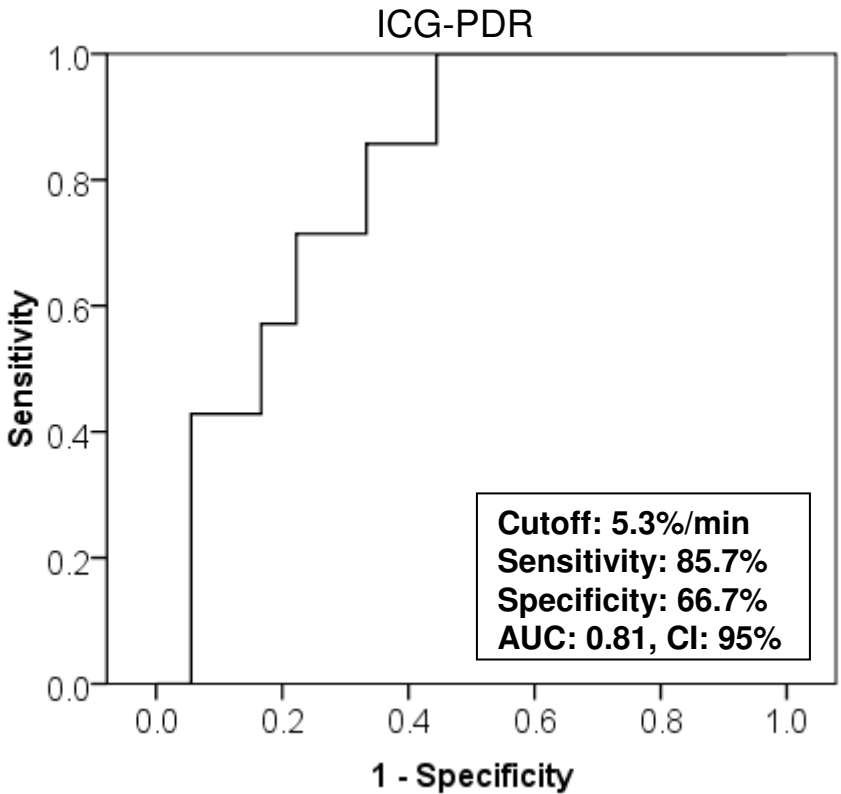

Supplement: MOESM3 [file 9439294]
